1

2 Linear motor driven-rotary motion of a  
3 membrane-permeabilized ghost in  
4 *Mycoplasma mobile*

5

6 Yoshiaki Kinosita<sup>1,\*</sup>, Makoto Miyata<sup>2</sup> & Takayuki Nishizaka<sup>1</sup>

7 <sup>1</sup>Department of Physics, Gakushuin University, 1-5-1 Mejiro, Toshima-ku, Tokyo 171-8588,  
8 Japan.

9 <sup>2</sup> Graduate School of Science, Osaka City University, 3-3-138 Sugimoto, Sumiyoshi-ku, 8  
10 Osaka 558-8585, Japan

11 \* Present address: Institute of Biology II, Freiburg University

12 Correspondence should be addressed to [yoshiaki.kinosita@gmail.com](mailto:yoshiaki.kinosita@gmail.com)

13

14

15

16 **Abstract**

17 *Mycoplasma mobile* exhibits a smooth gliding movement as does its membrane-  
18 permeabilized ghost model. This exceptionally prominent experimental system has  
19 allowed us to conclude that the energy source for *M. mobile* motility is adenosine  
20 triphosphate (ATP), and the gliding is largely comprised of repetitions of unitary steps of  
21 about 70 nm. In the present study, we show a new motility mode, in which the ghost  
22 model prepared with a high concentration of detergent exhibits directed rotational  
23 motions with a constant speed. With a rotational speed and viscous friction of a single  
24 ghost, the torque was estimated to be ~30 pN nm at saturated [ATP]s. Although the origin  
25 of the rotation has not been conclusively settled, we found that rotary ghosts treated with  
26 sialyllactose, the binding target for leg proteins, were stopped. This result suggested that  
27 biomolecules embedded on the cell membrane nonspecifically attaches to the glass and  
28 works as a flexible pivot point, and the linear motion of the leg is a driving force for a  
29 rotary motion. This simple geometry exemplifies the new mechanism, by which the  
30 movement of a linear motor is efficiently converted to a constant rotation of the object on  
31 a micrometer scale.

32

33

34

35

36 *Mycoplasma mobile* (*M. mobile*) is a flask-shaped bacterium under optimal conditions  
37 that can smoothly glide on a solid surface in the direction of a protrusion at a speed of up  
38 to  $4.5 \mu\text{m s}^{-1}$  [1] (Fig. 1A *top*). It lacks genes encoding conventional motor proteins such  
39 as myosin and kinesin, or bacterial flagella [2]. Three proteins essential for gliding are  
40 localized at a cell pole, and named as Gli123, Gli349 and Gli521 [3, 4]. These proteins  
41 are organized on the surface of machinery, and each of their numbers is estimated to be ~  
42 450 (Fig. 1A *bottom*). Their molecular functions are as follows: Gli123 is a scaffold for  
43 other molecular machineries [5]; Gli349 binds to sialylated oligosaccharides (SOs) on a  
44 solid surface as a leg [6, 7] [8]; and Gli521 transmits the force into the leg as the crank  
45 [9, 10]. The internal structures, including the  $\alpha$ - and  $\beta$ -subunit homologs of F-type ATPase,  
46 co-localized on the gliding machineries, suggesting that the internal structure might  
47 function as the motor for *Mycoplasma* gliding [11, 12]. Notably, the membrane-  
48 permeabilized ghost model revealed that the gliding machineries are driven by ATP  
49 hydrolysis; additionally, the smooth gliding movement was comprised of the repetition  
50 of 70-nm unitary steps [13, 14]. Although the actors in the motility have been gradually  
51 clarified, the mechanism by which the motor converts chemical energy into mechanical  
52 work remains an open question.

53 To explore the motor function in greater detail, we here constructed a motility assay that  
54 enabled detection of the rotary ghosts. Normally, the membrane-permeabilized ghost  
55 model is prepared with 0.09% Triton X-100, and the large number of ghosts showed a  
56 gliding motion after addition of ATP [13, 14]. In contrast, we found that a small  
57 percentage of ghosts prepared with a 0.013% concentration of detergent rotated at a fixed  
58 position like tethered-flagellated bacteria [15-17] (Supplementary Movie 1). In this  
59 condition, we also detected the gliding motion in ~50% of the ghost population, and the

60 gliding speed was similar to that of live cells at saturated [ATP]s (Fig. S2).

61 Rotational motions occurred in both directions, and the population of each cell was  
62 56% in the CW and 44% in the CCW direction ( $n = 150$ ; Fig. 1B). Note that the center  
63 position of the rotation did not move and the radius also remained constant, indicating  
64 that some flexible part was connected to a glass surface (Fig. 1C). Rotational rate was  
65 calculated from the slope of the revolution (Fig. 1D). With the rotational rate and viscous  
66 friction of ghost (see Method section), the frictional torque against the surrounding  
67 solution was estimated to be  $30.7 \pm 21.9$  in the CW direction, and  $29.8 \pm 11.5$  pN nm in  
68 the CCW direction at a saturated [ATP] ( $n = 84$  in CW,  $n = 66$  in CCW; Fig. 1E). We did  
69 not see a difference in the CW and CCW directions, and therefore analyzed CW and CCW  
70 rotation as the same ( $P = 0.1983 > 0.05$  by  $t$ -test).

71 We next investigated the effect of ATP concentration on the rotational rate of ghosts.  
72 In the range of 4–1200  $\mu\text{M}$  [ATP]s, the relationship between a rotational rate and [ATP]  
73 obeyed simple Michaelis-Menten kinetics, where  $V_{\text{max}}$  and  $K_{\text{m}}$  were 2.2 Hz and 32  $\mu\text{M}$ ,  
74 respectively ( $n = 480$ ; Fig. 1F). This suggested that the motor had no cooperativity in the  
75 ATP binding event. Note that the discrete steps were detected under low [ATP]s,  
76 suggesting that ATP binding is the rate-limiting step for rotary movement in this condition  
77 (Fig. S3); in addition, the high-speed imaging enabled us to detect stepwise motions even  
78 at saturated [ATP]s. From this analysis, step size, stepping torque and rate limiting steps  
79 were estimated to be  $34^\circ$ , 85–120 pN nm, and  $15.5 \text{ s}^{-1}$ , respectively (Supplementary  
80 Result and Discussion).

81 To investigate whether the leg protein contributed to the rotation, we treated ghosts  
82 with sialyllactose (SL), a binding target for legs [18, 19] (Fig. 2A). Notably, rotary ghosts  
83 did not detach from the glass surface but slowed down and/or stopped, while gliding

84 ghosts detached from the surface (Supplementary Movie 2, Fig. 2B). Additionally, the  
85 ratio of rotational rate ( $f_{\text{after}}/f_{\text{before}}$ ) decreased in proportion to [SL] (Fig. 2C). In this  
86 condition, the discrete stepwise movements were also detected even at saturated [ATP]s,  
87 which might correspond to the binding time of the leg to the SO (Fig. 2D). To determine  
88 the stepping angle quantitatively, we next fitted the data with a step-finding algorithm  
89 (see Methods section). From this analysis, the step size was estimated to be  $33.1 \pm 10.1^\circ$ ,  
90 assuming that the histogram comprises a single peak (Fig. 2E;  $n = 125$ ). The dwell time  
91 between steps depended on [SL], where the average and SD were  $0.37 \pm 0.39$  in 0.5 mM  
92 and  $0.55 \pm 0.51$  s in 3 mM, respectively ( $n = 83$  in 0.5 mM,  $n = 71$  in 3 mM; Fig. 2F).  
93 This result suggested that the leg binds to free SL and consequently, could not produce  
94 the thrust for rotation.

95 We next explored the effect of the antibody on the rotation. We used monoclonal  
96 antibodies (MAb) MAb7 and MAbR19 against Gli349 and Gli521, respectively, which  
97 influence binding activity and gliding speed, respectively [20]. By treating ghosts with  
98 MAb7, the gliding ghosts dissociated from the glass surface, while the rotary ghosts  
99 stopped but did not detach from the glass. In MAbR19 experiments, both gliding and  
100 rotary ghosts stopped suddenly, but did not detach from the glass (Supplementary Movie  
101 3). As stated previously, these results indicated that the crank Gli521 transmits the force,  
102 and the leg(s) Gli349 bind to and release from SO and produce the thrust [3, 4].

103 We considered possible mechanisms to explain the rotation. One scenario is the  
104 pivoting model: the leg produced the thrust for the rotation, while a flexible point such as  
105 the membrane is tethered to the surface (Fig. 2G). For a distance  $r$  between the power  
106 stroke of the active leg and tethered point to glass, the torque was estimated by the  
107 following equation:  $T = r \times F$ , where  $T$  is the torque, and  $F$  is the thrust of leg [21]. With

108 this model, bidirectional rotation could be produced depending on the geometry between  
109 the tethering point and the active leg. Given this model and assuming that a step length is  
110 70 nm [13], the distance  $r$  was estimated to be 120 nm using the following equation:  $L =$   
111  $2 r \sin (\theta / 2)$ , where  $L$  is a step length, and  $\theta$  is a step angle ( $33^\circ$ ), which might correspond  
112 to the periodicity of gliding machineries.

113 Although the number of legs involved in rotation was not conclusively determined,  
114 the thrust could be estimated to be 0.7-1 pN from the above equation, assuming that the  
115 number of legs for rotation was driven by a single leg, which was similar to the values  
116 estimated by an optical tweezer [22]. Interestingly, the 120-nm length is consistent with  
117 the size of Gli521 [9]; therefore, another possible rotary model is that one part of the same  
118 gliding machinery, such as Gli521, was sticking to a glass surface while pulling another  
119 part of the complex such as Gli349. If the gliding machinery exhibits constant  
120 displacement and force, the various outputs will be detected depending on the geometry  
121 of the pivoting model, e.g., the detection of smaller output when  $r$  is small, and vice versa.  
122 Considering that the repetitive steps are clear, and the distribution of steps was narrow  
123 (Fig. S5), this model might also be possible.

124 In this study, we could not exclude the possibility that the rotation was driven by the  
125 internal structure of *M. mobile*, which is the homolog of F-Type ATPase and co-localized  
126 on the gliding machinery. This is because some ghosts had a rotation axis in the middle  
127 and rotated like a propeller, the centroid of which is at the middle of the ghost, suggesting  
128 that the real rotary motor was connected to the glass surface as shown in F<sub>1</sub>-ATPase and  
129 bacterial flagella [15-17, 23, 24] (Supplementary Movie 4 and Fig. S8A). Because the  
130 motor should rotate itself to maintain the cell body, actin or bead rotating, they could  
131 show fake rotation like the cowboy if the one end of tip or backward attached to a surface

132 or  $\gamma$ -shaft. In *M. mobile*, however, the propeller rotation could also be explained by the  
133 pivoting mechanism.

134 To address whether *M. mobile* forms a rotary motor, 120°-steps should be detected in  
135 the propeller rotation. So far, we have detected step-like motions, though not 120°, at a  
136 few  $\mu\text{M}$  range of [ATP] (Fig. S8B). But we inferred that the next chemical cycle would  
137 start before the completion of mechanical work in this condition. Although we should  
138 improve the experimental condition to detect the rotation and steps at nM [ATP] like F<sub>1</sub>-  
139 ATPase [23], our novel assay would be helpful for clarifying the mystery of whether F-  
140 type ATPase is the motor for *Mycoplasma* gliding. Finally, as demonstrated in  
141 *Flavobacterium johnsoniae*, the molecular motor of which its rotary motion converts into  
142 linear motion might be common feature in gliding bacteria [25].

143

144

145

146 **Acknowledgements**

147 We thank Richard Berry for discussions that were critical in preparing the manuscript and  
148 Mitsuhiro Sugawa for developing the step-finding algorithm.

149 **Funding information**

150 This study was supported in part by the Funding Program for Next-Generation World-  
151 Leading Researchers Grant LR033 (to T.N.) from the Japan Society for the Promotion of  
152 Science, by a Grant-in-Aid for Scientific Research on Innovative Areas “Harmonized  
153 Supramolecular Motility Machinery and Its Diversity” (Grant number 24117002 to M.M.  
154 and Grant number 24117002 to T.N.) and by Grants-in-Aid for Scientific Research (B)  
155 and (A) (Ministry of Education, Culture, Sports, Science and Technology KAKENHI;  
156 Grant numbers 24390107 and 17H01544 to M.M) and “Fluctuation & Structure” (Grant  
157 No.26103527 to T.N.) from the Ministry of Education, Culture, Sports, Science, and  
158 Technology of Japan. Y.K was recipient of JSPS Fellowship for Japan Junior Scientists  
159 (15J12274) and Postdoctoral Fellowship for Research Abroad.

160 **Author Contributions:**

161 Y.K. and M.M. designed research; Y.K. performed research; Y.K. and T.N. constructed the  
162 optical setup and microscope; Y.K., M.M., and T.N. wrote the paper.

163

164



## 165 Reference

- 166 1. Morio H, Kasai T, & Miyata M (2015) Gliding direction of *Mycoplasma mobile*.  
167 *Journal of Bacteriology* **198**(2):283-290.
- 168 2. Jaffe JD, Stange-Thomann N, Smith C, DeCaprio D, Fisher S, Butler J, *et al.*  
169 (2004) The complete genome and proteome of *Mycoplasma mobile*. *Genome*  
170 *Research* **14**(8):1447-1461.
- 171 3. Miyata M (2010) Unique centipede mechanism of *Mycoplasma* gliding. *Annual*  
172 *Review of Microbiology* **64**:519-537.
- 173 4. Miyata M & Hamaguchi T (2016) Prospects for the gliding mechanism of  
174 *Mycoplasma mobile*. *Current Opinion in Microbiology* **29**:15-21.
- 175 5. Uenoyama A & Miyata M (2005) Identification of a 123-kilodalton protein  
176 (Gli123) involved in machinery for gliding motility of *Mycoplasma mobile*.  
177 *Journal of Bacteriology* **187**(16):5578-5584.
- 178 6. Adan-Kubo J, Uenoyama A, Arata T, & Miyata M (2006) Morphology of isolated  
179 Gli349, a leg protein responsible for *Mycoplasma mobile* gliding via glass binding,  
180 revealed by rotary shadowing electron microscopy. *Journal of Bacteriology*  
181 **188**(8):2821-2828.
- 182 7. Uenoyama A, Kusumoto A, & Miyata M (2004) Identification of a 349-kilodalton  
183 protein (Gli349) responsible for cytheadherence and glass binding during gliding of  
184 *Mycoplasma mobile*. *Journal of Bacteriology* **186**(5):1537-1545.
- 185 8. Nagai R & Miyata M (2006) Gliding motility of *Mycoplasma mobile* can occur  
186 by repeated binding to N-acetylneuraminyllactose (sialyllactose) fixed on solid  
187 surfaces. *Journal of Bacteriology* **188**(18):6469-6475.
- 188 9. Nonaka T, Adan-Kubo J, & Miyata M (2010) Triskelion structure of the Gli521  
189 protein, involved in the gliding mechanism of *Mycoplasma mobile*. *Journal of*  
190 *Bacteriology* **192**(3):636-642.
- 191 10. Seto S, Uenoyama A, & Miyata M (2005) Identification of a 521-kilodalton  
192 protein (Gli521) involved in force generation or force transmission for  
193 *Mycoplasma mobile* gliding. *Journal of Bacteriology* **187**(10):3502-3510.
- 194 11. Nakane D & Miyata M (2007) Cytoskeletal "jellyfish" structure of *Mycoplasma*  
195 *mobile*. *Proceedings of the National Academy of Sciences of the United States of*  
196 *America* **104**(49):19518-19523.
- 197 12. Tulum I, Yabe M, Uenoyama A, & Miyata M (2014) Localization of P42 and F(1)-  
198 ATPase alpha-subunit homolog of the gliding machinery in *Mycoplasma mobile*  
199 revealed by newly developed gene manipulation and fluorescent protein tagging.  
200 *Journal of Bacteriology* **196**(10):1815-1824.

- 201 13. Kinoshita Y, Nakane D, Sugawa M, Masaike T, Mizutani K, Miyata M, *et al.* (2014)  
202 Unitary step of gliding machinery in *Mycoplasma mobile*. *Proceedings of the*  
203 *National Academy of Sciences of the United States of America* **111**(23):8601-8606.
- 204 14. Uenoyama A & Miyata M (2005) Gliding ghosts of *Mycoplasma mobile*.  
205 *Proceedings of the National Academy of Sciences of the United States of America*  
206 **102**(36):12754-12758.
- 207 15. Berg HC (1974) Dynamic properties of bacterial flagellar motors. *Nature*  
208 **249**(452):77-79.
- 209 16. Larsen SH, Reader RW, Kort EN, Tso WW, & Adler J (1974) Change in direction  
210 of flagellar rotation is the basis of the chemotactic response in *Escherichia coli*.  
211 *Nature* **249**(452):74-77.
- 212 17. Silverman M & Simon M (1974) Flagellar rotation and the mechanism of bacterial  
213 motility. *Nature* **249**(452):73-74.
- 214 18. Kasai T, Hamaguchi T, & Miyata M (2015) Gliding motility of *Mycoplasma*  
215 *mobile* on uniform oligosaccharides. *Journal of Bacteriology* **197**(18):2952-2957.
- 216 19. Kasai T, Nakane D, Ishida H, Ando H, Kiso M, & Miyata M (2013) Role of  
217 binding in *Mycoplasma mobile* and *Mycoplasma pneumoniae* gliding analyzed  
218 through inhibition by synthesized sialylated compounds. *Journal of Bacteriology*  
219 **195**(3):429-435.
- 220 20. Uenoyama A, Seto S, Nakane D, & Miyata M (2009) Regions on Gli349 and  
221 Gli521 protein molecules directly involved in movements of *Mycoplasma mobile*  
222 gliding machinery, suggested by use of inhibitory antibodies and mutants. *Journal*  
223 *of Bacteriology* **191**(6):1982-1985.
- 224 21. Lele PP, Roland T, Shrivastava A, Chen Y, & Berg HC (2016) The flagellar motor  
225 of *Caulobacter crescentus* generates more torque when a cell swims backward.  
226 *Nature Physics* **12**(2):175-178.
- 227 22. Mizutani M, Tulum I, Kinoshita Y, Nishizaka T, & Miyata M (2017) Detailed  
228 analyses of stall force generation in *Mycoplasma mobile* gliding. *bioRxiv*.
- 229 23. Yasuda R, Noji H, Kinoshita K, Jr., & Yoshida M (1998) F<sub>1</sub>-ATPase is a highly  
230 efficient molecular motor that rotates with discrete 120 degree steps. *Cell*  
231 **93**(7):1117-1124.
- 232 24. Yasuda R, Noji H, Yoshida M, Kinoshita K, Jr., & Itoh H (2001) Resolution of  
233 distinct rotational substeps by submillisecond kinetic analysis of F<sub>1</sub>-ATPase.  
234 *Nature* **410**(6831):898-904.
- 235 25. Shrivastava A, Lele PP, & Berg HC (2015) A rotary motor drives *Flavobacterium*  
236 gliding. *Current Biology : CB* **25**(3):338-341.

## 237 **Figure Legends**

### 238 **Figure 1 ATP-dependent rotation of tethered ghosts**

239 (A) Schematics of a single cell (*top*) and a gliding machinery (*bottom*). (B) Upper  
240 and Bottom: Sequential images of a ghost in CCW and CW rotation at 100-ms  
241 intervals, respectively. Scale bar, 1  $\mu\text{m}$ . (C) The trajectories of the center of mass  
242 in CCW and CW rotation. Blue and green represent CCW and CW rotation,  
243 respectively, and their colors coincide with d and e. (D) Time course of revolution  
244 of the tethered ghost. (E) Histograms of a torque in both directions. Torque was  
245 calculated by a rotational speed and a viscous friction in each cell. Solid lines  
246 represent the Gaussian function, where  $30.7 \pm 21.9$  and  $29.8 \pm 11.5$  pN nm in CW  
247 and CCW rotations, respectively ( $n = 84$  in CW rotation,  $n = 66$  in CCW rotation).  
248 (F) The rotation rate of ghost at different [ATP]s ( $n = 480$ ). Solid line showed the  
249 Michaelis-Menten kinetics:  $V = V_{\text{max}} [\text{ATP}] / (K_m + [\text{ATP}])$ , where  $V_{\text{max}}$  and  $K_m$  were  
250 2.2 Hz and 32  $\mu\text{M}$ , respectively.

### 251 **Figure 2 Linear movement generated the rotary motion**

252 (A) Schematic illustration of the experiment. Gray and red legs are before and  
253 after addition of the sialyllactose (SL), respectively. (B) Typical example of the  
254 time course of revolution in presence of a free SL in solution. The arrow  
255 represents the time when SL were added. *Inset*; Blue dot and green line at 33-  
256 ms intervals represent a rotational trace before and after addition of the free SL  
257 in solution, respectively (C) Dependence of a free SL on a rotation rate at the  
258 saturated [ATP]. *Left*; Time course of revolution under the various [SL]s, 0.5-3  
259 mM. *Right*; The relationship between the rotational speed and mM [SL] ( $n = 56$ ).

260 The relative speed  $f$  represents the  $f_{\text{after}}/f_{\text{before}}$ . (D) Typical examples of a stepwise  
261 rotation under the various [SL]s. Black, cyan, and green dots represent the raw  
262 data at 0, 0.5, 3 mM [SL], respectively. Rectangles in the rotation are lines fitted  
263 by the step-finding algorithm (see the methods section in detail). (E) Histogram  
264 of the step size calculated by a step-finding algorithm ( $n = 125$ ). Solid line showed  
265 the Gaussian function, where the size was  $33.1 \pm 10.1$  degree. (F) Histograms of  
266 dwell times at 0.5 and 3 mM [SL]. Arrows in each graph indicate the average  
267 value which are  $0.37 \pm 0.39$  in 0.5 mM and  $0.55 \pm 0.51$  sec in 3 mM, respectively  
268 ( $n = 83$  in 0.5 mM,  $n = 71$  in 3 mM). (G) Schematics of the pivoting model for  
269 rotation. The green and blue dots represent the tethered point to the surface. The  
270 red dot represents the position of active leg(s); additionally, the red and pink  
271 arrows correspond to the direction of thrust from a surface and the direction of  
272 leg's force to a surface, respectively. The width of gray-dot lines ( $r$ ) represents  
273 the distance between the power stroke of the active leg and tethered point.  
274 Depending on the tethered point, the rotational direction could be changed; e.g.,  
275 the CW direction in the case of the blue tethering point.  
276

Fig. 1

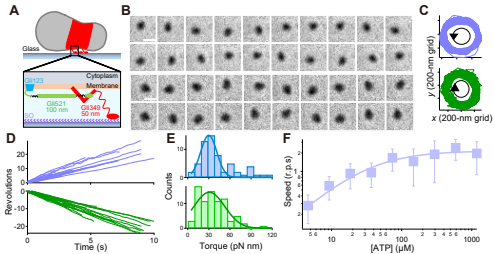

Fig. 2

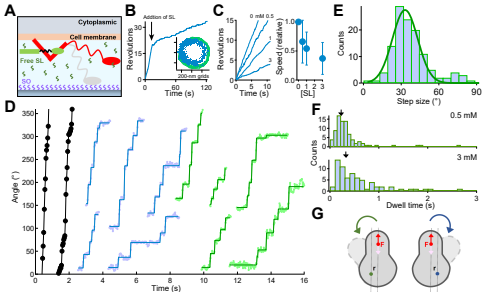

Source: https://www.biorxiv.org/content/10.1101/286278v1.full.pdf
